# Supplementary material for: Demystifying the feasibility of in vivo nonresonant Raman spectroscopy of the human retina
Source: Research Square preprint supplement (doi:10.21203/rs.3.rs-3891690/v1), 2025-08-27
Supplement: Supplementary file 1 [file 1f990f05bda54de3eb2bac8e.docx]

Supplementary information for

**Demystifying in vivo non-resonant Raman spectroscopy of the human retina**

Ryan Sentosa *et al.*

*Corresponding author. Email: rainer.leitgeb@meduniwien.ac.at

**This file includes:**

Supplementary Text

Tables. S1 to S3

Figs. S1 to S2

Supplementary Text

Unlike resonant Raman spectroscopy measurement which limits the molecular information to electronic chromophores1,2, we observed rich spectral information in the Raman fingerprint region (400 cm-1 to 1800 cm-1) by using the non-resonant approach. To critically analyze the acquired Raman signal, we compared our observation to the anatomic molecular constituents originated from the measurement location itself. Three different retina layers might contribute to our acquired Raman signal, namely the superficial nerve fiber layer (SNFL), the prelaminar region (PR), and the laminar region (LR)3. The main components of these layers are the axons from the retinal ganglion cells (RGCs) accounting for approximately 90% of the total composition, the glial cells, predominantly astrocytes in the subnuclear layer (SNL) and microglia in the peripheral and lateral (PR/LR) regions, extracellular matrix, comprising collagens and elastin (main components of lamina cribrosa in the LR), glycoproteins, and proteoglycans, and finally blood vessels4,5. Recent ribonucleic acid (RNA) sequencing analysis has also listed the relevant cells that populate this neural retina environment, including glial cells, fibroblasts, endothelial cells, mural cells and immune-related cells6. The axons transport molecules between the synapse (RGCs) and its soma (lateral geniculate nucleus)7. The main constituents of axons are the cytoskeletal proteins (e.g. microtubules, neurofilaments and actin filaments)8–11, the axonal membrane, mitochondria, transport proteins and neurotransmitters4. The astrocytes fasciculate the axons to form nerve fiber bundles, supply glucose to the neural cells and act as a limiting membrane to the surrounding (blood-optic nerve and vitreous)3. To support its role and shape, the astrocytes show an abundance of intermediate proteins, such as green fibrillary acidic protein (GFAP), vimentin and nestin12,13.

Neurofilament proteins (NfP) are the main cytoskeletal proteins of the axons14. Although they have 5 different forms and lengths in humans, they have a similar backbone, which can be divided into an alpha-helical rod domain, an amino-terminal head domain and a variable-length carboxyl-terminal end domain15. The distribution of these neurofilaments is heterogeneous along the optic nerve, but dominated by the neurofilament heavy chain (NFH), the phosphorylated NFH (NFHp) and the neurofilament medium chain (NFM)14,16. The tail segment of NFM and NFH is rich in glutamic acid, lysine, alanine, proline and serine17,18.

The lipid distribution on the eye is heterogeneous19,20. In the optic nerve head region, phosphatidylcholine (PC) and sphingomyelin (SM) are abundant, with some contribution of phosphatidylserine (PS) and phosphatidylethanolamine (PE). These phospholipids are the building blocks of the axonal and cell membranes.

Based on this knowledge, we list the tentative assignment of the Raman bands observed from our measurement in the Supplementary Table S1. Briefly, the acquired Raman spectra show a contribution of the major macromolecules, i.e. carbohydrates, proteins, lipids and nucleic acids.

**Table S1. Tentative assignment of the observed Raman spectroscopy measurement from human optic nerve head in vivo**

| Observed Raman peak | Carbohydrates | | Protein | | Lipid | | DNA/RNA | |
| --- | --- | --- | --- | --- | --- | --- | --- | --- |
| 479 | 484(peak) (307-596)21  51821  54221 | β(CCO), β(COC), β(OCO) glycogen    β(CCO), β(COC), β(OCO) β-saccharide  β(CCO), β(COC), β(OCO) α-saccharide |  |  | 41522  42922,23 | PI  β(CH2,ring) cholesterol (+ester) |  |  |
| 502(s) |  |  |  |  | 50024  50424 | T  G |
| 511 | 51024,25 | ν(S-S)  cystine (ggg) | 51922,26 | δring PI |  |  |
| 524 | 52524,25 | ν(S-S)  cystine (ggt or tgg) | 52422 | PS |  |  |
| 536 | 54024,25 | ν(S-S)  cystine (tgt) | 53822,26 | β(CH2,ring) cholesterol ester |  |  |
| 552 |  |  | 54822,26 | β(CH2,ring) cholesterol | 549-58026 | A, C, T, G (weak) |
| 575 | 57827 | Trp | 57622,26 | β(C-OH) PI |
| 594 |  |  | 59522 | PS |  |  |
| 603(s) |  |  |  |  | 60822,26 | δring cholesterol | 59924 | C |
| 618 (sh) |  |  | 62127–29 | Phe ring breathing | 61422,26 | δring cholesterol ester |  |  |
| 644 |  |  | 64327,28  630-67024 | Tyr Ring breathing  ν(C-S) *gauche* Met |  |  |  |  |
| 664 |  |  | 66426,30 | ν(C-S) cysteine |  |  |  |  |
| 674 |  |  |  |  |  |  | 67124  67324 | T  δ6,ring G |
| 680 (s) |  |  | 68031,32 | Pyrrole ring deformation heme protein |  |  |  |  |
| 703 |  |  | 700-74524 | ν(C-S) *trans* Met | 70222,23 | δring cholesterol (ester) |  |  |
| 721 (m) |  |  |  |  | 71922,26 | νs(N+(CH3)3) PC, SM | 73124 | A |
| 751(w) |  |  | 751(771)26,33  75026,32 | Phe ring breathing  Pyrrole ring breathing heme protein | 73322,26 | ν(C-N) PS | 74524  75224 | ν(-O-P-O) Z-DNA  T |
| 761 (sh) |  |  | 75827,28 | δ5,ring Trp | 75922,23 | ν(C-N) ethanolamine PE |  |  |
| 776 (m) |  |  |  |  | 77622,26 | δinositol PI |  |  |
| 785 (m) |  |  |  |  | 78722 | PS | 784(785, 788)24  79024 | C (U, T)  ν(-O-P-O) B-DNA |
| 804 (sh) |  |  |  |  |  |  | 80724 | ν(-O-P-O) A-DNA |
| 823 |  |  | 81734  817(826)33  82528 | ν(C-C) protein  Phe  Tyr |  |  |  |  |
| 834 |  |  |  |  |  |  | 83524 | ν(-O-P-O) B-DNA |
| 849 | 84821,22,35,36 | ν(C-C), β(CH) α-saccharide | 84737  84838  85028 | Lys  Ala  Tyr |  |  |  |  |
| 858 | 85621,35 | ν(COC), β(CC), ring breathing, β(CH) of C-1 glycogen | 85630,34,39  85633 | Pro  Phe | 86022 | phosphatidic acid |  |  |
| 874 | 86821,22,35,36 | ν(C-C), β(CH) β-saccharide | 87726,34,39 | hydroxyproline | 87522,26 | νas(N+(CH3)3) PC |  |  |
| 881 |  |  | 88027 | Trp | 88223,26 | νas(N+(CH3)3) SM |  |  |
| 889 | 89421,22,35,36 | β(CCH), β(CCO) β-saccharide |  |  | 89222,23 | ρ(CH3) and ρ(CH2) fatty acid |  |  |
| 915 (s) | 91621,22,35,36 | β(CCH), β(CCO) α-saccharide | 91130  92233 | Pro  Phe |  |  |  |  |
| 932 (s, sh) |  |  | 93428,29 | N-Cα-C (α-helix) skeletal mode |  |  |  |  |
| 946 | 94121,35 | νs(C-O-C) glycogen of glycosidic bond |  |  |  |  |  |  |
| 956  974 988 | 950-99629 | ν(C-C), ρ(CH2) skeletal mode | 950-99629 | ν(C-C), ρ(CH2) skeletal mode | 950-99629 | ν(C-C), ρ(CH2) skeletal mode | 98024 | monophosphates |
| 1005 |  |  | 100427 | δring Phe |  |  |  |  |
| 1010 |  |  | 101227 | δ6,ring Trp |  |  |  |  |
| 1029 | 1022 (sh)21,35 | ν(C-O), ν(C-C) glucose | 103227,33 | β(CH) Phe |  |  |  |  |
| 1046 | 105021,35 | ν(C-O), ν(C-C) glycogen | 1030-117029 | ν(C-N), ν(C-C), ρas(NH3) amino acids |  |  |  |  |
| 1061 | 106621,35 | ν(C-O), ν(C-C) glucose | 106522,23 | νas(C-C), ν(C-O) |  |  |
| 1080 |  |  |  |  |  |  |
| 1087 | 108821,35 | β(C-OH), β(CH) glycogen | 108723  109622 | νs(C-C) (*gauche*)  ν(PO2−) | 1095-109924 | νs(PO2-) |
| 1134 | 112821,35  113021,35 | ν(CC), ν(CO), β(COH) glucose  ν(CO), ν(CC), β(COH), νs(COC) in glycosidic link, ring breathing glycogen | 113122,23 | νs(C-C) fatty acid |  |  |
| 1159 |  |  |  |  |  |  |
| 1173 |  |  | 117827,40 | β(CH) Tyr | 117823 | ν(C-C) fatty acid |  |  |
| 1207 |  |  | 120727,40  121027,40 | ν(CC), β(CH) Phe  ν(CC), β(CH) Tyr |  |  |  |  |
| 1245 (s) |  |  | 1225-124741 1239-124542  1254-126242 | β-sheet (amide III)  random coil (amide III) |  |  | 1232 (1242, 1245)24 | U (T, C) |
| 1267 (sh) | 126521,35  126221,35 | τ(CH2) saccharides  β(CH), β(CCH), β(OCH), β(COH) Glycogen | 1254-126742,43 | random coil (amide III) | 127022,23,44 | δ(=CH)  unsaturated fatty acid |  |  |
| 1288 (sh) |  |  | 1270-128741 1293(6)43 | α-helix Protein (amide III) |  |  |  |  |
| 1295 |  |  | ~1300-140027,29,37,38,45 | νs(COO-) of base β(CCH), ρ,τ,ω(CH2) of side chains | 129822 | τ(CH2) fatty acid | 129524 | C |
| 1310 |  |  | 1291-132441 | β-turns  protein (amide III) |  |  | 130924 | A |
| 1328 | 133321,22  133721 | ω(CH2) α-saccharide  β(COH), β(CH)  glycogen | 134026,27 | Fermi resonance Trp |  |  | 132524  134024 | G  A |
| 1359 | 136021,22 | ω(CH2) β-saccharide | 136126,27 |  |  | 1367 (1379)24 | G (T) |
| 1396 | 138721 | β(CH(2)) glycogen | ~1300-140027,29,37,38,45 | νs(COO-) of base β(CCH), ρ,τ,ω(CH2) of side chains |  |  | 1380 (1397)24 | A (T) |
| 1451 | 146021,35 | δ(CH2), β(COH) glycogen  δ(CH2) glucose | 1420-145222,26 | δ(CH2) protein | 1420-147022,26,29 | δsc(CH2), β(CH2/CH3)  phospholipids | 1416(1489)24 | G, A |
| 1502 |  |  | 149527 | β(CCH) Trp |  |  | 151224 | A |
| 1549 |  |  | 155226,27  155829(1504-1565)46 | ν5,ring(C=C) Trp  protein (Amide II) |  |  | 153024 | C |
| 1579 |  |  | 157927 | ν6,ring(CC) Trp |  |  | 157824  158224 | G  A |
| 1589 |  |  | 158627 | νring (*oop*) Phe |  |  |  |  |
| 1606 |  |  | 160427 160627 | νas(COO-) βas(NH3) Tyr  νring (*ip*) Phe |  |  | 160624 | C |
| 1620 |  |  | 161627  162127  163526,42,47 | νring(CC) Tyr  ν6,ring(CC) Trp  β-sheet (Amide I) |  |  |  |  |
| 1652 |  |  | 165343 1645-165724 | ν(C=O), β(NH) α-helix (Amide I) |  |  | 164724 | C |
| 1660 |  |  | 1660-166524  1664-166942 | unordered (Amide I)  β-strand (Amide I) | 166022 | ν(C=C) unsaturated fatty acid | 166424 | T |
| 1671 |  |  | 1677-169226,42,43  1640-169041 | random coil and β-turns (Amide I)  β-turns (Amide I) | 166922  167422  167222 | ν(C=C) cholesterol ester  ν(C=C) cholesterol  ν(C=O), β(N-H) SM |  |  |
| 1692 |  |  |  |  | 168124 | U |
| 1710  1719  1734  1743  1750 |  |  |  |  | 1716(1732)22  173422  173822  1729(1740)22 | PS  PI  PC  ν(C=O) ester bond |  |  |

Vibration mode:

β: bending, δ: scissoring, δring: ring in plane breathing, ρ: rocking, τ: twisting, ν: stretching, νas: asymmetric stretching, νs: symmetric stretching, ν(5/6),ring: (5/6) ring in plane deformation, ω: wagging, *ip*: *in plane*, *oop*: *out of plane*.

s: strong, sh: shoulder, m: medium, w: weak.

Proteins:

Phe: phenylalanine, Trp: Tryptophan, Tyr: tyrosine, Pro: proline, Lys: lysine, Ala: alanine, Met: methionine, [S-S]: sulphur-sulfur, *ggg*: *gauche gauche gauche*, *tgt*: *trans gauche trans.* (C in protein column refers to the chemical element Carbon)

Lipids:

PI: phosphatidylinositol, PS: phosphatidylserine, PE: phosphatidylethanolamine, PC: phosphatidylcholine, SM: sphingomyelin.

RNA/DNA:

A: adenine, C: cytosine, T: thymine, G: guanine, U: uracil, [-O-P-O]: phosphodiester backbone, [PO2-]: phosphodioxy group.

Table S2. Raman bands from intra-subject measurement based on Table S1

| Statistically significant Raman band (cm-1) | Tentative assignment |
| --- | --- |
| 559-574 | glucose (sh), glycogen, tryptophan, cholesterol, phosphatidylinositol, nucleoside (w) |
| 646-652 | tyrosine, methionine |
| 937-938 | skeletal mode (carbohydrates, protein, lipids) |
| 1637 | β-sheet of amide I |
| 1643-1645 | α-helix of amide I, cytosine |
| 1675-1678 | β-turn of amide I, cholesterol |
| 1716-1724 | phosphatidylserine |

Table S3. Raman bands from different age groups based on Table S1 (*p<0.05, **p<0.01, ***p<0.001, + positive difference, - negative difference)

| Statistically significant Raman band (cm-1) | | | Tentative assignment | Selected peak position | Spearman correlation coeff. w.r.t. age |
| --- | --- | --- | --- | --- | --- |
| (45-65) - <45 | >65 - (45-65) | >65 - <45 |
|  | 601-605 + | 595-611 + | PS, cholesterol, C | 603 | r = 0.296*** |
| 615-621 + |  |  | Phe, cholesterol ester | 618 | r = 0.136* |
|  | 657-661 - |  | Met, Cys (sh) | 654 | r = -0.131 |
| 753-757 - |  | 746-759 - | Phe, Trp, heme protein, PE, T, OPO Z-DNA | 751 | r = -0.319*** |
|  | 791-810 + | 791-813 + | OPO A-DNA, B-DNA | 804 | r = 0.458*** |
| 905-932 + |  | 906-927 + | skeletal mode (carbohydrates, proteins, lipids) | 915 | r = 0.309*** |
|  |  | 946-954 - | 946 | r = -0.314*** |
| 1048-1075 - | 1058-1071 - | 1049-1084 -  1091-1136 - | 1061 | r = -0.425*** |
| 1101-1124 - | 1114-1140 - | skeletal mode, PO2- RNA/DNA | 1086 | r = -0.168* |
| 1157-1169 + |  | 1159-1163 + | unassigned |  | |
| 1196-1246 + |  | 1202-1293 + | Phe, Tyr, β-sheet (amide III), U, T, C | 1207  1245 | r = 0.315***  r = 0.274*** |
| 1250-1298 + |  | saccharides, α-helix (amide III) un(saturated) fatty acids | 1267  1288 | r = 0.467***  r = 0.322*** |
| 1318-1396 - | 1349-1418 + | 1318-1336 -  1370-1376 - | saccharide, glycogen, Trp, G, A, T | 1310  1328  1359  1396 | r = -0.191**  r = -0.335***  r = -0.180**  r = 0.127 |
| 1403-1427 - |  | skeletal mode (carbohydrates, proteins, lipids), G | 1451 | r = -0.127 |
| 1446-1531 + | 1470-1491 -  1499-1512 - |  | skeletal mode (carbohydrates, proteins, lipids), A  Trp, A | 1502 | r = 0.139* |
| 1613-1678 - |  | 1612-1667 -  1673-1680 - | Tyr, Trp, amide I, unsaturated fatty acids, cholesterol ester, C, T  cholesterol, SM | 1620  1652  1660  1671 | r = 0.321***  r = -0.426***  r = -0.415***  r = -0.340*** |
| 1704-1718 + |  |  | PS | 1745 | r = 0.482*** |
| 1728-1733 +  1736-1791 + | 1743-1748 + | 1734-1774 + | PS, PI |
| PC, ester bond of lipids |

See the caption below Table S1 for description of the acronyms


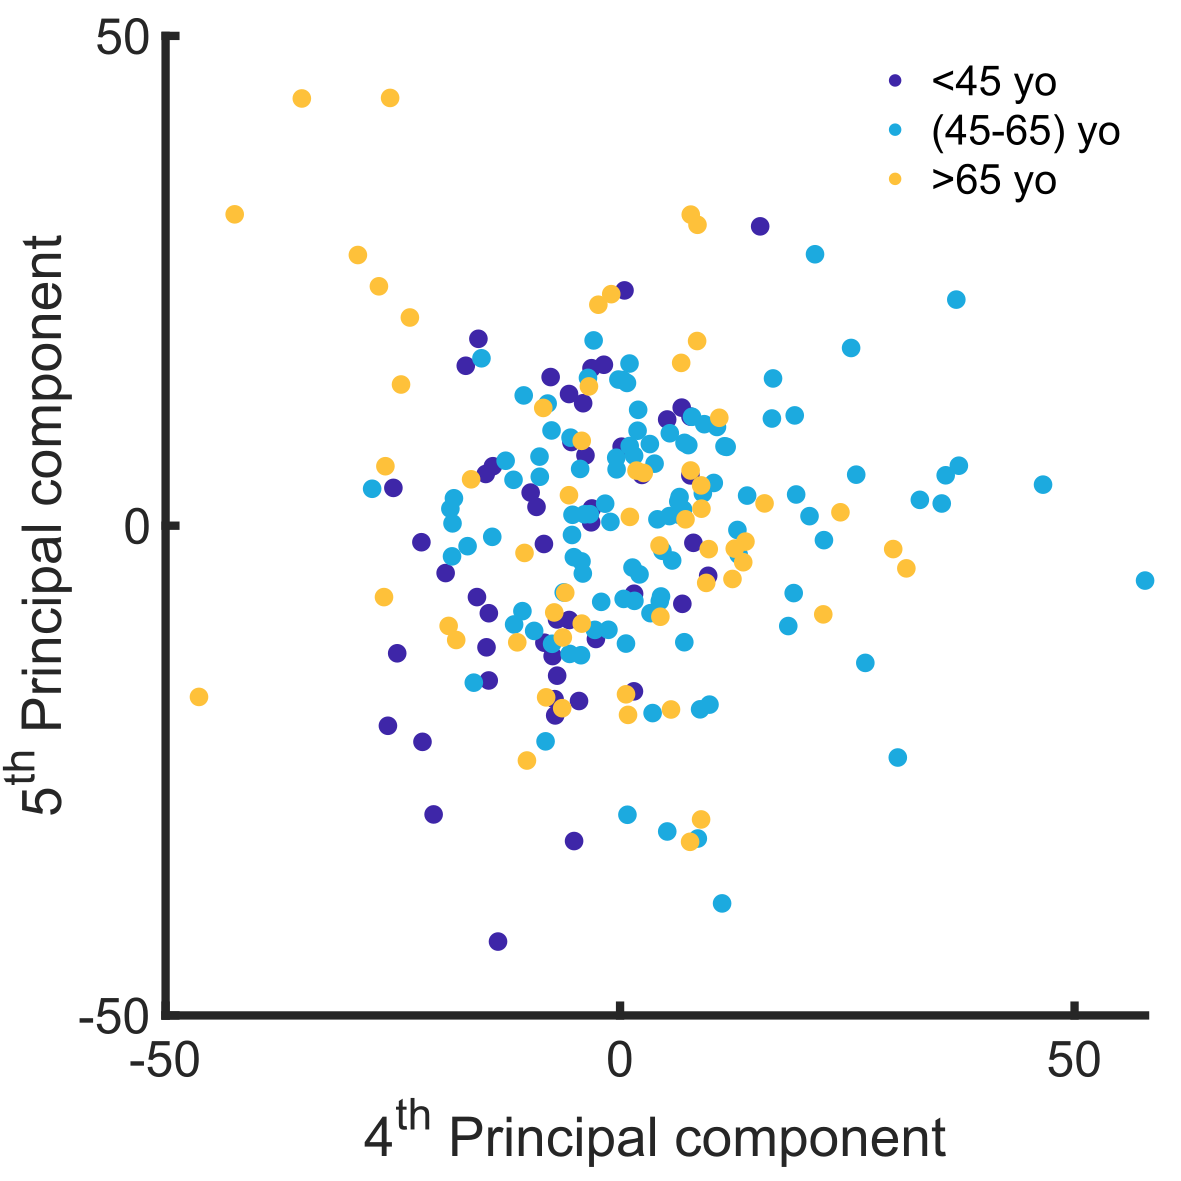


Fig. S1. PCA score plot of the 4th and 5th component. Description can be found in the Results section in the main text.


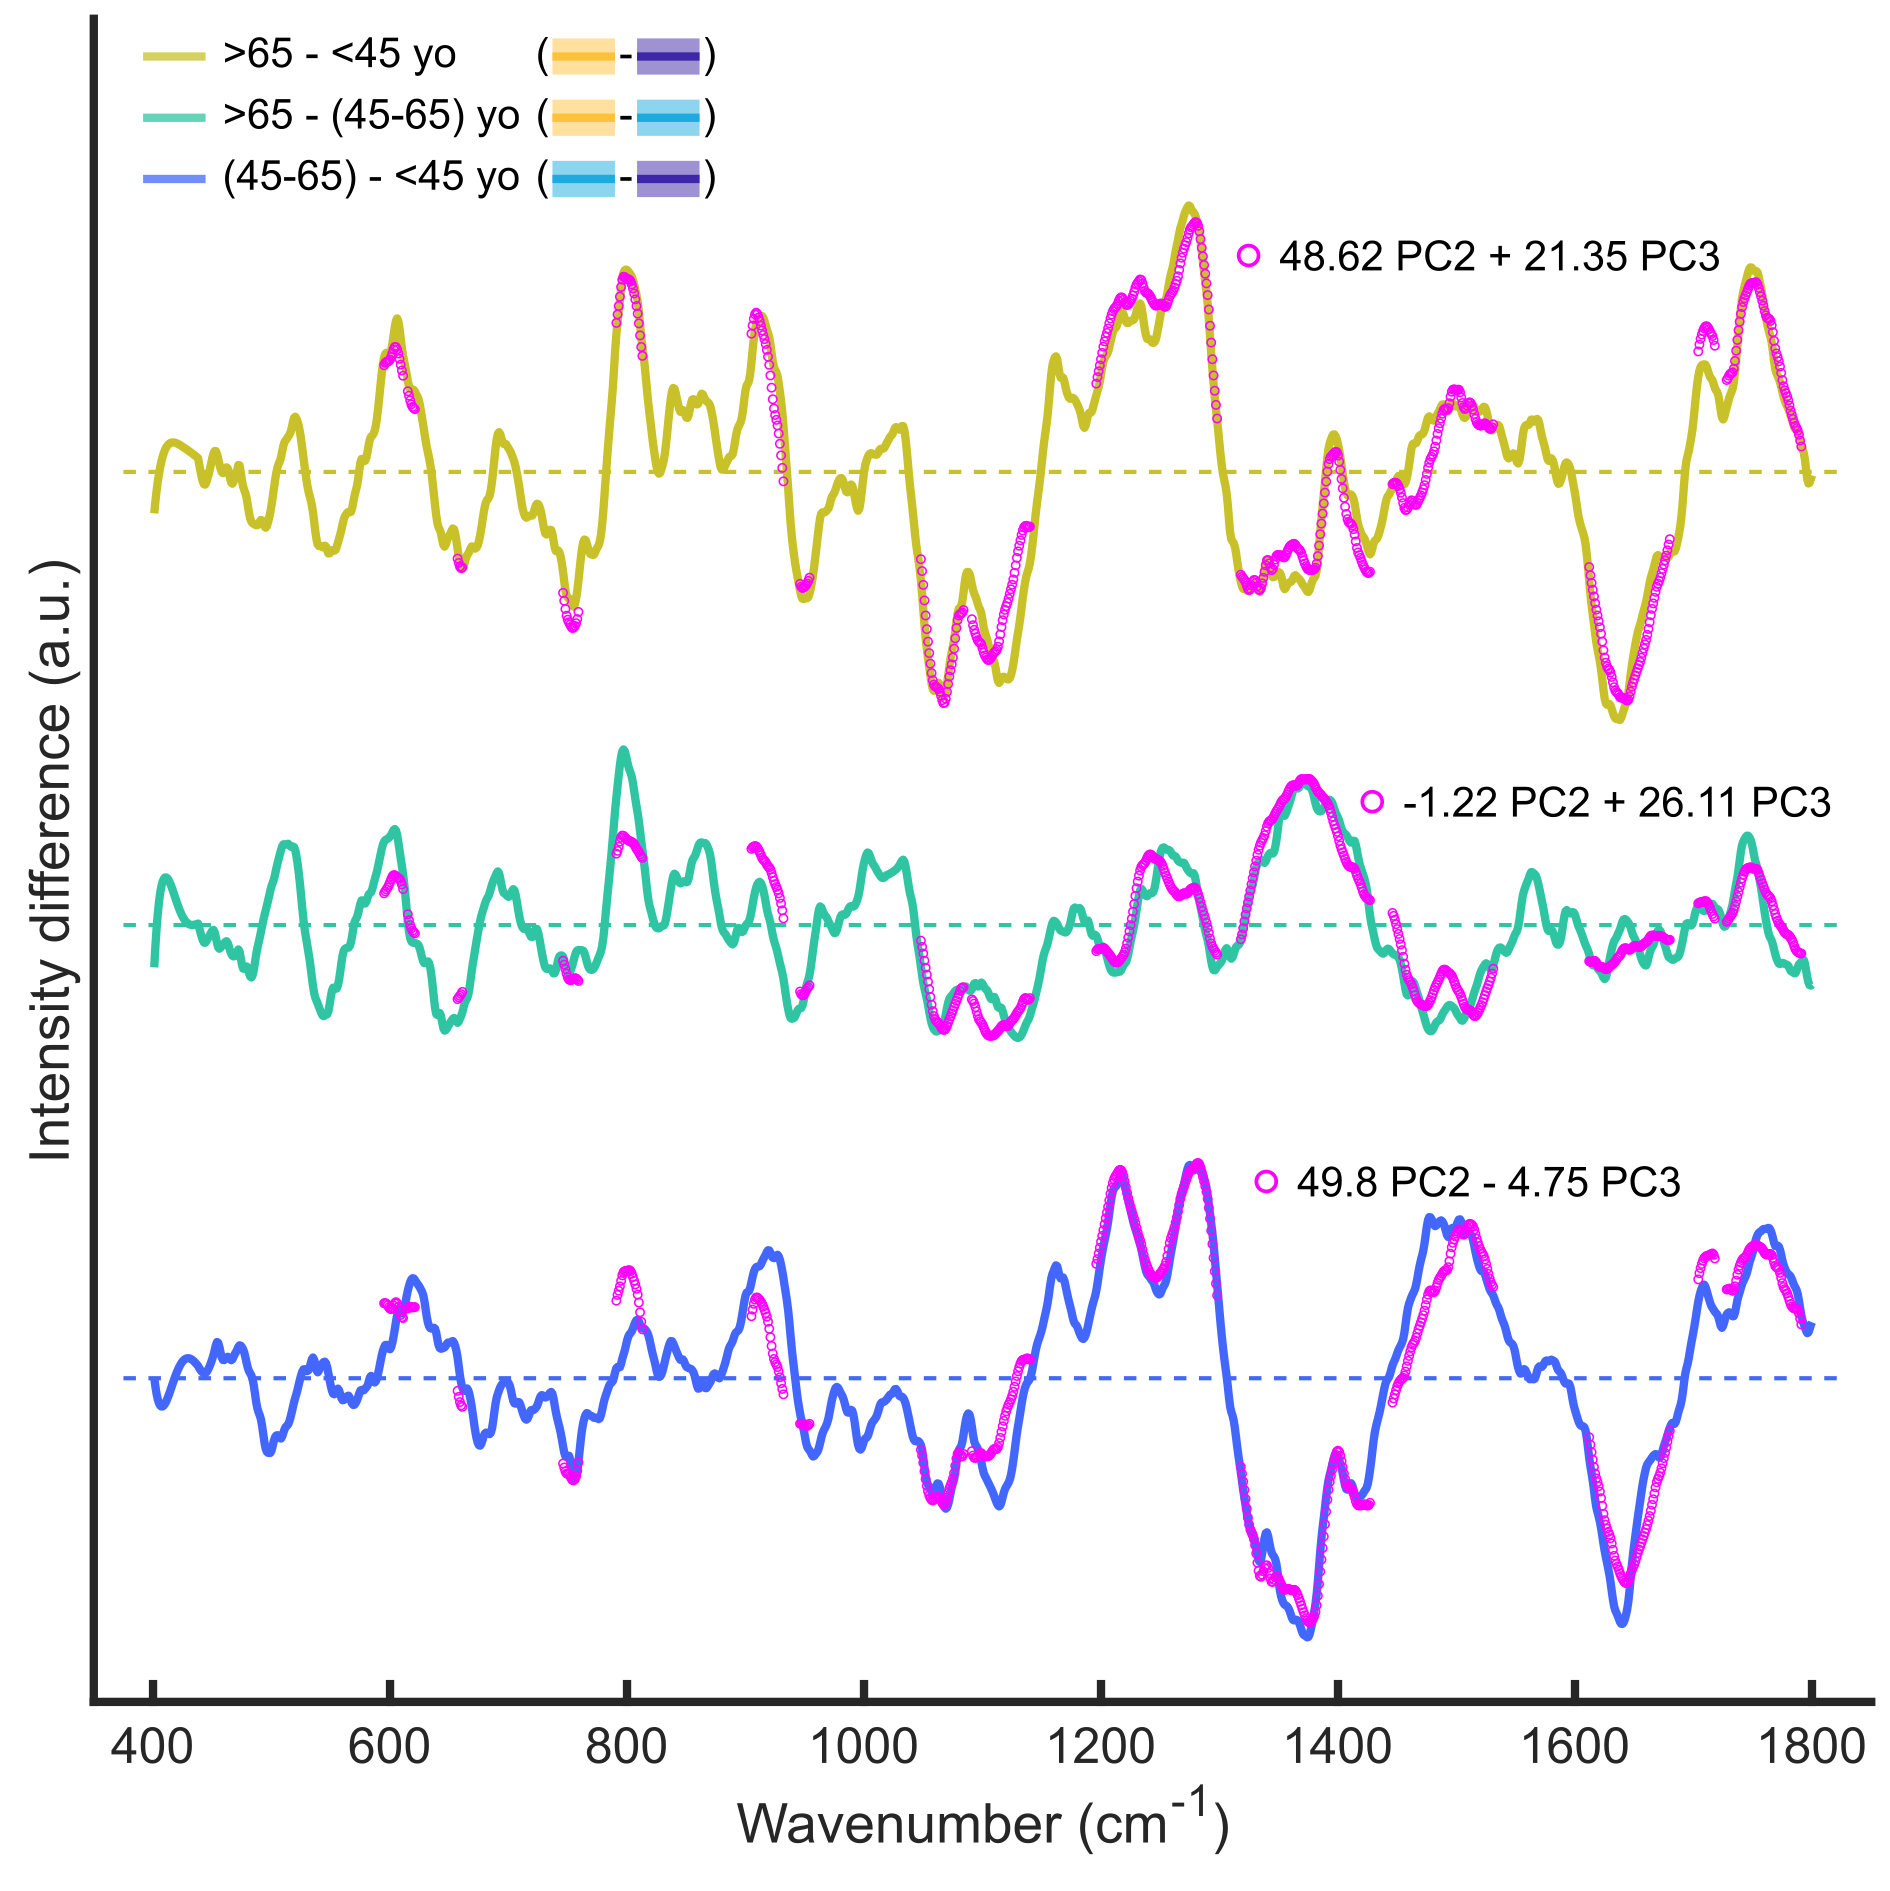


Fig. S2. Intensity difference between each group-pair (<45, (45-65), >65 yo) with the contribution of the 2nd and 3rd principal component. Description can be found in the Results section in the main text.

**References**

1. Li, B. *et al.* Imaging lutein and zeaxanthin in the human retina with confocal resonance Raman microscopy. *Proc. Natl. Acad. Sci. U.S.A.* **117**, 12352–12358 (2020).

2. Cakir, B. *et al.* In vivo noninvasive mitochondrial redox assessment of the optic nerve head to predict disease. *PNAS Nexus* **2**, pgad148 (2023).

3. J. Salazar, J. *et al.* Anatomy of the Human Optic Nerve: Structure and Function. in *Optic Nerve* (ed. M. Ferreri, F.) (IntechOpen, 2019). doi:10.5772/intechopen.79827.

4. Rizzo, J. Embryology, anatomy, and physiology of the afferent visual pathway. *Clinical Neuro-Ophthalmology* 3–82 (2005).

5. Lee, A. G. *et al.* Anatomy of the Optic Nerve and Visual Pathway. in *Nerves and Nerve Injuries* 277–303 (Elsevier, 2015). doi:10.1016/B978-0-12-410390-0.00020-2.

6. Monavarfeshani, A. *et al.* Transcriptomic analysis of the ocular posterior segment completes a cell atlas of the human eye. *Proc. Natl. Acad. Sci. U.S.A.* **120**, e2306153120 (2023).

7. Guedes-Dias, P. & Holzbaur, E. L. F. Axonal transport: Driving synaptic function. *Science* **366**, eaaw9997 (2019).

8. Kirkcaldie, M. T. K. & Collins, J. M. The axon as a physical structure in health and acute trauma. *Journal of Chemical Neuroanatomy* **76**, 9–18 (2016).

9. Leterrier, C., Dubey, P. & Roy, S. The nano-architecture of the axonal cytoskeleton. *Nat Rev Neurosci* **18**, 713–726 (2017).

10. Vassilopoulos, S., Gibaud, S., Jimenez, A., Caillol, G. & Leterrier, C. Ultrastructure of the axonal periodic scaffold reveals a braid-like organization of actin rings. *Nat Commun* **10**, 5803 (2019).

11. Zhang, W. *et al.* Fano resonance line shapes in the Raman spectra of tubulin and microtubules reveal quantum effects. *Biophysical Reports* **2**, 100043 (2022).

12. Cullen, P. F. & Sun, D. Astrocytes of the eye and optic nerve: heterogeneous populations with unique functions mediate axonal resilience and vulnerability to glaucoma. *Front. Ophthalmol.* **3**, 1217137 (2023).

13. Lopez, N. N., Clark, A. F. & Tovar-Vidales, T. Isolation and characterization of human optic nerve head astrocytes and lamina cribrosa cells. *Exp Eye Res* **197**, 108103 (2020).

14. Kang, M. H., Law-Davis, S., Balaratnasingam, C. & Yu, D.-Y. Sectoral variations in the distribution of axonal cytoskeleton proteins in the human optic nerve head. *Experimental Eye Research* **128**, 141–150 (2014).

15. Yuan, A. & Nixon, R. A. Neurofilament Proteins as Biomarkers to Monitor Neurological Diseases and the Efficacy of Therapies. *Front. Neurosci.* **15**, 689938 (2021).

16. Balaratnasingam, C., Morgan, W. H., Johnstone, V., Cringle, S. J. & Yu, D.-Y. Heterogeneous Distribution of Axonal Cytoskeleton Proteins in the Human Optic Nerve. *Investigative Ophthalmology & Visual Science* **50**, 2824–2838 (2009).

17. Geisler, N., Kaufmann, E., Fischer, S., Plessmann, U. & Weber, K. Neurofilament architecture combines structural principles of intermediate filaments with carboxy-terminal extensions increasing in size between triplet proteins. *The EMBO Journal* **2**, 1295–1302 (1983).

18. Yuan, A., Rao, M. V., Veeranna & Nixon, R. A. Neurofilaments and Neurofilament Proteins in Health and Disease. *Cold Spring Harb Perspect Biol* **9**, a018309 (2017).

19. Zemski Berry, K. A., Gordon, W. C., Murphy, R. C. & Bazan, N. G. Spatial organization of lipids in the human retina and optic nerve by MALDI imaging mass spectrometry. *Journal of Lipid Research* **55**, 504–515 (2014).

20. Anderson, D. M. G. *et al.* Lipid Landscape of the Human Retina and Supporting Tissues Revealed by High-Resolution Imaging Mass Spectrometry. *J. Am. Soc. Mass Spectrom.* **31**, 2426–2436 (2020).

21. Wiercigroch, E. *et al.* Raman and infrared spectroscopy of carbohydrates: A review. *Spectrochimica Acta Part A: Molecular and Biomolecular Spectroscopy* **185**, 317–335 (2017).

22. Krafft, C., Neudert, L., Simat, T. & Salzer, R. Near infrared Raman spectra of human brain lipids. *Spectrochimica Acta Part A: Molecular and Biomolecular Spectroscopy* **61**, 1529–1535 (2005).

23. Czamara, K. *et al.* Raman spectroscopy of lipids: a review. *J Raman Spectroscopy* **46**, 4–20 (2015).

24. Krafft, C. Raman Spectroscopy of Proteins and Nucleic Acids: From Amino Acids and Nucleotides to Large Assemblies. in *Encyclopedia of Analytical Chemistry* (ed. Meyers, R. A.) 1–15 (Wiley, 2018). doi:10.1002/9780470027318.a9611.

25. Nakamura, K. *et al.* Conformational changes in seventeen cystine disulfide bridges of bovine serum albumin proved by Raman spectroscopy. *FEBS Letters* **417**, 375–378 (1997).

26. Pezzotti, G. Raman spectroscopy in cell biology and microbiology. *J Raman Spectroscopy* **52**, 2348–2443 (2021).

27. Hernández, B., Pflüger, F., Adenier, A., Kruglik, S. G. & Ghomi, M. Vibrational Analysis of Amino Acids and Short Peptides in Hydrated Media. VIII. Amino Acids with Aromatic Side Chains: l -Phenylalanine, l -Tyrosine, and l -Tryptophan. *J. Phys. Chem. B* **114**, 15319–15330 (2010).

28. Nemecek, D., Stepanek, J. & Thomas, G. J. Raman Spectroscopy of Proteins and Nucleoproteins. *CP Protein Science* **71**, (2013).

29. Talari, A. C. S., Movasaghi, Z., Rehman, S. & Rehman, I. ur. Raman Spectroscopy of Biological Tissues. *Applied Spectroscopy Reviews* **50**, 46–111 (2015).

30. Zhu, G., Zhu, X., Fan, Q. & Wan, X. Raman spectra of amino acids and their aqueous solutions. *Spectrochimica Acta Part A: Molecular and Biomolecular Spectroscopy* **78**, 1187–1195 (2011).

31. Atkins, C. G., Buckley, K., Blades, M. W. & Turner, R. F. B. Raman Spectroscopy of Blood and Blood Components. *Appl Spectrosc* **71**, 767–793 (2017).

32. Rygula, A. *et al.* Raman spectroscopy of proteins: a review: Raman spectroscopy of proteins. *J. Raman Spectrosc.* **44**, 1061–1076 (2013).

33. Hernández, B., Pflüger, F., Kruglik, S. G. & Ghomi, M. Characteristic Raman lines of phenylalanine analyzed by a multiconformational approach. *J Raman Spectroscopy* **44**, 827–833 (2013).

34. Martinez, M. G., Bullock, A. J., MacNeil, S. & Rehman, I. U. Characterisation of structural changes in collagen with Raman spectroscopy. *Applied Spectroscopy Reviews* **54**, 509–542 (2019).

35. Dudek, M. *et al.* Raman Optical Activity and Raman spectroscopy of carbohydrates in solution. *Spectrochimica Acta Part A: Molecular and Biomolecular Spectroscopy* **206**, 597–612 (2019).

36. Söderholm, S., Roos, Y. H., Meinander, N. & Hotokka, M. Raman spectra of fructose and glucose in the amorphous and crystalline states. *Journal of Raman Spectroscopy* **30**, 1009–1018 (1999).

37. Hernández, B., Pflüger, F., Derbel, N., De Coninck, J. & Ghomi, M. Vibrational Analysis of Amino Acids and Short Peptides in Hydrated Media. VI. Amino Acids with Positively Charged Side Chains: l -Lysine and l -Arginine. *J. Phys. Chem. B* **114**, 1077–1088 (2010).

38. Hernández, B., Pflüger, F., Nsangou, M. & Ghomi, M. Vibrational Analysis of Amino Acids and Short Peptides in Hydrated Media. IV. Amino Acids with Hydrophobic Side Chains: l -Alanine, l -Valine, and l -Isoleucine. *J. Phys. Chem. B* **113**, 3169–3178 (2009).

39. Bergholt, M. S., Serio, A. & Albro, M. B. Raman Spectroscopy: Guiding Light for the Extracellular Matrix. *Front. Bioeng. Biotechnol.* **7**, 303 (2019).

40. Hernández, B., Coïc, Y., Pflüger, F., Kruglik, S. G. & Ghomi, M. All characteristic Raman markers of tyrosine and tyrosinate originate from phenol ring fundamental vibrations. *J Raman Spectroscopy* **47**, 210–220 (2016).

41. Krimm, S. & Bandekar, J. Vibrational Spectroscopy and Conformation of Peptides, Polypeptides, and Proteins. in *Advances in Protein Chemistry* vol. 38 181–364 (Elsevier, 1986).

42. Guiffo-Soh, G. *et al.* Vibrational Analysis of Amino Acids and Short Peptides in Hydrated Media. 3. Successive KL Repeats Induce Highly Stable β-Strands Capable of Forming Non-H-Bonded Aggregates. *J. Phys. Chem. B* **112**, 1282–1289 (2008).

43. Guiffo-Soh, G., Hernández, B., Coïc, Y.-M., Boukhalfa-Heniche, F.-Z. & Ghomi, M. Vibrational Analysis of Amino Acids and Short Peptides in Hydrated Media. II. Role of KLLL Repeats To Induce Helical Conformations in Minimalist LK-Peptides. *J. Phys. Chem. B* **111**, 12563–12572 (2007).

44. Motoyama, M., Nakajima, I., Ohmori, H., Watanabe, G. & Sasaki, K. A Raman Spectroscopic Method of Evaluating Fat Crystalline States and Its Application in Detecting Pork Fat. *JARQ* **52**, 17–22 (2018).

45. Derbel, N. *et al.* Vibrational Analysis of Amino Acids and Short Peptides in Hydrated Media. I. L-glycine and L-leucine. *J. Phys. Chem. B* **111**, 1470–1477 (2007).

46. Szekeres, G. P. & Kneipp, J. SERS Probing of Proteins in Gold Nanoparticle Agglomerates. *Front. Chem.* **7**, 30 (2019).

47. Voicescu, M., Ionescu, S. & Nistor, C. L. Spectroscopic study of 3-Hydroxyflavone - protein interaction in lipidic bi-layers immobilized on silver nanoparticles. *Spectrochimica Acta Part A: Molecular and Biomolecular Spectroscopy* **170**, 1–8 (2017).
